# Supplementary material for: Effects of Land Reclamation on Soil Bacterial Community and Potential Functions in Bauxite Mining Area
Source: MDPI journal article supplement (doi:10.3390/ijerph192416921), 2022-12-16
Supplement: s1 [file s1]

Supplementary Materials:

Table S1. The Second National Soil Census Nutrient Classification Standard of China.

| Grades | SOC (g·kg <sup>-1</sup> ) | TN (g·kg <sup>-1</sup> ) | AN (mg·kg <sup>-1</sup> ) | TP (g·kg <sup>-1</sup> ) | AP (mg·kg <sup>-1</sup> ) | Interpretation |
|--------|---------------------------|--------------------------|---------------------------|--------------------------|---------------------------|----------------|
| I      | >40                       | >2                       | >150                      | >2                       | >40                       | Very high      |
| II     | 30~40                     | 1.5~2                    | 120~150                   | 1.5~2                    | 20~40                     | High           |
| III    | 20~30                     | 1~1.5                    | 90~120                    | 1~1.5                    | 10~20                     | Upper          |
| IV     | 10~20                     | 0.75~1                   | 60~90                     | 0.75~1                   | 5~10                      | Middle         |
| V      | 6~10                      | 0.5~0.75                 | 30~60                     | 0.5~0.75                 | 3~5                       | Low            |
| VI     | ≤6                        | ≤0.5                     | ≤30                       | ≤0.5                     | ≤3                        | Very low       |

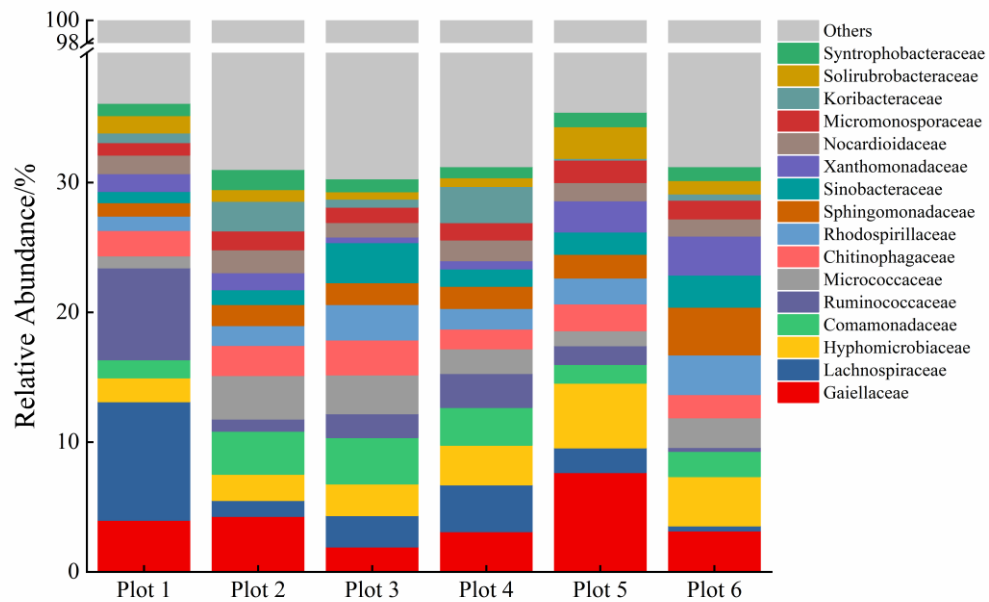

**Figure S1.** Bacterial community composition at the level of family in different plots. The family with relative abundance greater than 1% were defined as dominant family, and sequences not classified to any taxonomy and phylogenetic groups accounting for ≤1% of all classified sequences are summarized in the group “Others”.

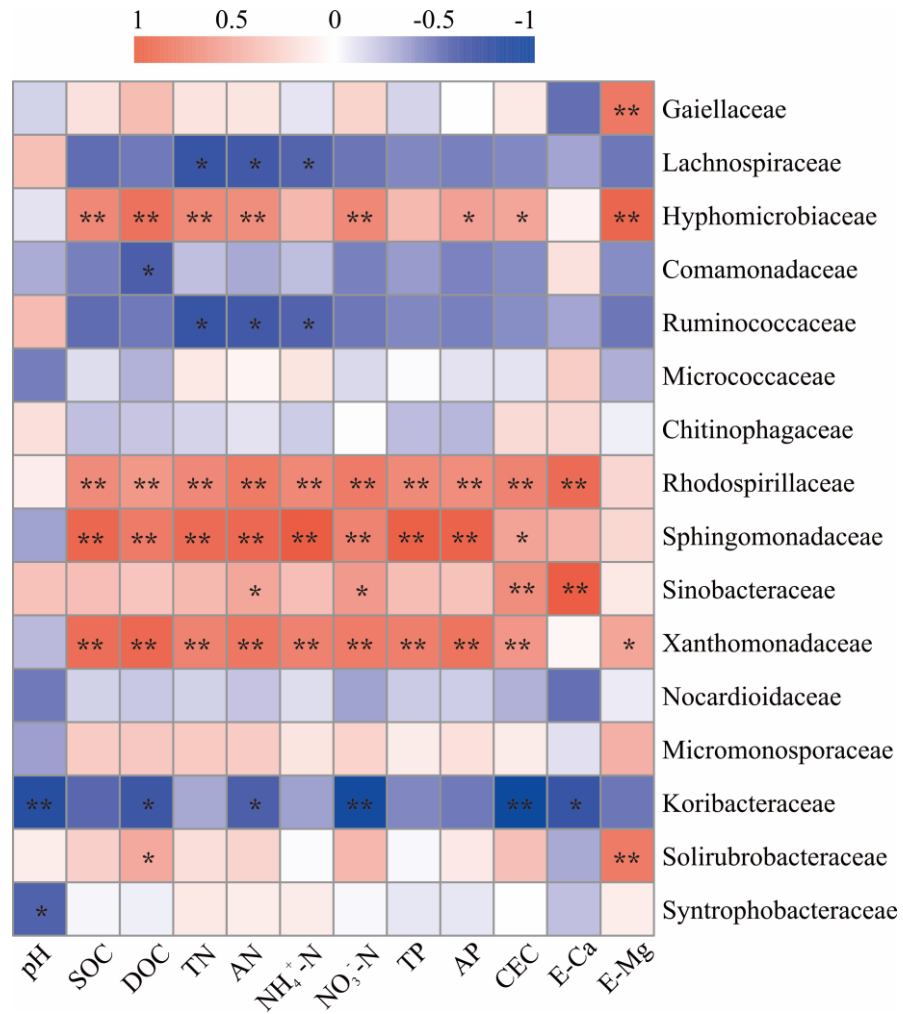

**Figure S2.** Correlations of dominant family and soil physicochemical properties, \*  $p < 0.05$  (Pearson correlation, two-tailed), \*\*  $p < 0.01$  (Pearson correlation, two-tailed).
